## ANT BREATHING: TESTING REGULATION AND MECHANISM HYPOTHESES WITH HYPOXIA

JOHN R. B. LIGHTON AND DANA GARRIGAN

Biology Department, University of Utah, Salt Lake City, Utah 84112, USA

Accepted 6 March 1995

### Summary

Using normoxic and hypoxic flow-through respirometry, we investigated the regulation of the closed-spiracle (C) and the nature of the fluttering-spiracle (F) phases of the discontinuous gas-exchange cycle (DGC) of the ant *Camponotus vicinus*. We predicted that as ambient O<sub>2</sub> concentrations declined, DGC frequency would increase, because C phase duration would decrease (reflecting earlier hypoxic initiation of the F phase) and F phase duration would shorten (reflecting nitrogen accumulation), if convective mass inflow caused by a negative pressure gradient across the spiracles, rather than by diffusion, is the dominant F phase gas-exchange mechanism. C phase duration decreased with declining ambient O<sub>2</sub> concentrations, as predicted. In contrast, DGC frequency decreased and F phase duration increased with decreasing

ambient O<sub>2</sub> concentrations. This was opposite to the expected trend if gas exchange in the F phase was mediated by convection, as is generally hypothesized. We therefore cannot disprove that F phase gas exchange was largely or purely diffusion-based. In addition, our data show equivalent molar rates of H<sub>2</sub>O and CO<sub>2</sub> emission during the F phase. In contrast, during the open-spiracle phase, the duration of which was not affected by ambient O<sub>2</sub> concentration, far more H<sub>2</sub>O than CO<sub>2</sub> was lost. We discuss these findings and suggest that current hypotheses of F phase gas-exchange mechanisms and function in reducing respiratory water loss in adult insects may require revision.

Key words: ant, *Camponotus vicinus*, discontinuous ventilation, hypoxia, metabolic rate.

### Introduction

Discontinuous external gas exchange is now known to occur in many adult insects, as well as in the diapausing lepidopteran pupae in which it was first discovered (Kestler, 1978, 1980, 1985; Lighton, 1988*a,b*; Lighton, 1990, 1991*a*, 1992; Lighton and Lovegrove, 1990; Lighton *et al.* 1993*a,b*; Lighton and Wehner, 1993). Cyclic discontinuities in external gas exchange have been referred to as discontinuous ventilation cycles or DVCs (Lighton, 1988*a*), using the term 'ventilation' *sensu lato* to denote whole-organism gas exchange, as opposed to mitochondrial respiration. However, this term can cause confusion because 'ventilation' usually denotes convective, as opposed to diffusive, gas exchange. To avoid such confusion, we here use the broader expression 'discontinuous gas-exchange cycle' or DGC (other terms in general use, e.g. closed-flutter-open or closed-flutter-ventilate, do not emphasize the cyclic nature of the phenomenon and assign putative spiracular states that may not occur in all cases; Lighton, 1991*a*). Although the existence of the DGC has been documented and partly characterized in several species of insects, little attention has been paid to several important aspects of the DGC. Notable among these are the regulation of the closed-spiracle or C phase and the nature of the fluttering-spiracle or F phase (for reviews of the insect DGC, see Miller, 1981; Kestler, 1985; Slama, 1994; Lighton, 1994).

The C phase is initiated when the insect's spiracles constrict, effectively eliminating or severely reducing external gas exchange. At the start of the C phase, endotracheal O<sub>2</sub> concentrations are close to atmospheric (Levy and Schneiderman, 1966). At the end, endotracheal O<sub>2</sub> partial pressures fall to approximately 3–5 kPa and, in lepidopteran pupae at least, this hypoxia triggers central nervous system (CNS)-mediated fluttering, or rapid partial openings, of the spiracles. The ultimate evolutionary rationale for the DGC is widely hypothesized to be reduction of respiratory water loss (Lighton *et al.* 1993*b*; Lighton, 1994, and references therein; but see Hadley and Quinlan, 1993; Lighton and Berrigan, 1995). Plainly the C phase represents a *reductio ad absurdum* in this respect. Other things being equal, C phase prolongation is the most powerful method of reducing respiratory water loss. The factors that modulate C phase duration are therefore of some significance. In spite of this, direct data on C phase regulation in adult insects are lacking, and we assume that similar modulatory factors are at work in diapausing pupae and adult insects.

A similar situation exists with respect to the F phase. In diapausing pupae, significant negative endotracheal pressures develop by the end of the C phase (Burkett and Schneiderman, 1974; Slama, 1988), and there has also been sporadic

documentation of negative endotracheal pressures in adult insects (Kestler, 1985; Lighton *et al.* 1993a). During the F phase, this negative pressure is generally thought to provide the insect with sufficient O<sub>2</sub> for mitochondrial respiration *via* convective mass flow into the tracheal system, which also retards outward diffusion of H<sub>2</sub>O, making the F phase an important factor in reducing respiratory water loss rates (see Kestler, 1985). But it stands to reason that diffusion must also play an important role in F phase gas exchange because of the huge (approximately 16–18 kPa) partial pressure gradient for O<sub>2</sub> and the smaller but still significant (approximately 4–6 kPa) gradient for CO<sub>2</sub> (Levy and Schneiderman, 1966). On the basis of these partial pressure gradients, a respiratory exchange ratio (RER) of approximately 0.2–0.3 would be predicted during the F phase, and such RERs have been directly measured (Lighton, 1988a). In contrast, removal of ambient air with no inward or outward diffusive component, as predicted by a purely convective model, is equivalent to a tiny reduction in flow rate and as such is difficult or impossible to detect by flow-through respirometry, which contradicts experimental data (Lighton, 1994). Yet strangely, in spite of its importance to recent theoretical analyses of insect gas exchange (Snyder *et al.* 1995), the hypothesis that convection plays a more important role than diffusion during the F phase of adult insects has not been explicitly tested.

Hypotheses concerning the termination of the C phase and the role of diffusion in the F phase can be efficiently, if indirectly, tested by altering ambient O<sub>2</sub> concentrations. Ambient O<sub>2</sub> concentration determines the maximum molar quantity of O<sub>2</sub> available at the start of each C phase, and the consensus C phase termination hypothesis therefore predicts that C phase duration will shorten with declining O<sub>2</sub> concentrations. Ambient O<sub>2</sub> concentration also affects the amount of O<sub>2</sub> transported by convection or diffusion into the tracheae during the F phase. If convection predominates in the F phase, then in accordance with the Hagen–Poiseuille equation (see Loudon, 1989), O<sub>2</sub> ingress rates during hypoxia will rapidly fall to insupportably low levels because increasing nitrogen accumulations will impede negative pressure generation. This will force premature termination of the F phase and thus increase DGC frequency (Snyder *et al.* 1995). Outward diffusion of nitrogen, which would otherwise partially counteract this process (see Kestler, 1985), will not occur in a purely convective model (Snyder *et al.* 1995). In contrast, if diffusion predominates in the F phase, hypoxia must induce an increase in trans-spiracular conductance to compensate for low ambient O<sub>2</sub> concentrations by effectively increasing the area term of the Fick equation. This increased conductance must also elevate CO<sub>2</sub> emission levels during the F phase, thus delaying the hypercapnic initiation of the open-spiracle phase (O phase) and *decreasing* DGC frequency.

We report here the modulation of the C phase and the primary mechanism of the F phase in an ant *Camponotus vicinus* (Mayr), using flow-through respirometry combined

with direct mass measurement at O<sub>2</sub> concentrations ranging from ambient (21 %) down to 8 %. In doing so, we test two main hypotheses. First, that the termination of the C phase in adult insects is triggered chiefly by endotracheal hypoxia. And second, that the primary mechanism of O<sub>2</sub> ingress during the F phase in adult insects is inward convection. The first hypothesis is disproved if the duration of the C phase increases or remains constant as ambient O<sub>2</sub> concentration is reduced. The second hypothesis is disproved if the duration of the F phase increases or remains constant as ambient O<sub>2</sub> concentration is reduced, as a result of which DGC frequency will remain constant or decrease (see also Discussion).

## Materials and methods

### *Animals*

We collected a subcolony of *Camponotus vicinus* (Mayr) from a riverine forest habitat in Red Butte Canyon, Salt Lake County, Utah, USA. This large-bodied, polymorphic ant is widespread in the American southwest, occurring in habitats ranging from xeric to mesic, with a tendency towards increased cuticular pigmentation in representatives from more mesic habitats. The cuticular pigmentation in our sample was a dark, translucent yellow. We maintained our ants in a culture room at 24±2 °C on a 12 h:12 h L:D cycle, and fed them on sugar water and chopped mealworms *ad libitum*.

### *Experimental animal preparation*

We normally utilized female alates for our research because their large body mass (>100 mg) aided in preparation and because female alates have traditionally been neglected in physiological studies relative to workers, in spite of their far greater importance to colony survival, especially in the crucial foundation stages (Lighton *et al.* 1993b; Lighton and Berrigan, 1995; S. Rissing, personal communication).

We prepared an alate for measurement by cold anesthetization, then decapitation. Following decapitation, we carefully sealed the wound with low-melting-point wax and fixed the alate by the extreme tips of its tarsi to a cardboard pad (8 mm×15 mm) saturated with low-melting-point wax.

Decapitation was necessary because direct mass measurements (see below) are exquisitely sensitive to movement-induced artifacts. Decapitation exerted a profoundly calming influence on the ants while leaving their cyclic gas exchange characteristics minimally affected relative to their intact motionless state (see also Lighton, 1992; Lighton *et al.* 1993a,b; and the Discussion). In particular, all of the ants displayed clearly differentiated closed, flutter and open-spiracle phases, thus yielding the comparative data we required. Only data from ants that showed normal gas-exchange cycles within 30 min of decapitation and that continued to cycle regularly for the duration of the recording were used.

### Respirometry and mass measurement

Flow-through CO<sub>2</sub>-based respirometry was performed as described elsewhere (Lighton, 1990, 1991b), utilizing a Sable Systems TR-3 respirometry system (Sable Systems, 476 E South Temple, Salt Lake City, UT 84111, USA). We modified the respirometry system slightly to vary O<sub>2</sub> concentration by injecting N<sub>2</sub> at a controlled flow rate into the CO<sub>2</sub>-free incurrent airstream; the initial O<sub>2</sub> concentration was 20.95±0.02%. Post-mixing O<sub>2</sub> concentration, measured to a resolution of 0.01% with an Ametek S-3A O<sub>2</sub> analyzer, was continuously recorded during each experiment.

Mass loss measurements were made simultaneously, as described elsewhere (Lighton *et al.* 1993b). Briefly, we modified a Cahn C-32 ultramicrobalance by extending one scale pan with a 150 mm fine-gauge hot-drawn Nichrome hangdown. This hangdown extended through a laser-aligned passage into a chamber (volume ca. 2500 ml) flushed at a rate of 250 ml min<sup>-1</sup> with CO<sub>2</sub>-free air of precisely known O<sub>2</sub> concentration. This rate of flow was independent of O<sub>2</sub> concentration. A much smaller respirometer chamber (volume 40 ml) accommodated a lightweight pan on which the ant was placed. The pan was suspended from the hangdown. Air was withdrawn from the weighing chamber and into the analysis system at a rate of 75 ml min<sup>-1</sup>, controlled by a Sierra Instruments mass flow controller.

By recording the mass readings at 20-bit resolution and employing digital filtration, we extended the effective resolution of the balance from 100 ng to approximately 20 ng when sampling at 5 s intervals. Rate of mass loss was then obtained by differentiating the mass recordings against time in hours. Mass loss measurements are closely equivalent to direct water loss measurements made by infrared gas analysis (Lighton *et al.* 1993b). Consequently the term 'water loss' is used below when referring to our mass loss measurements (see Kestler, 1985; Lighton, 1992, for details). Because we were interested only in comparing water loss rates over the DGC, we subtracted cuticular (defined as C phase) water loss rates from the recordings, leaving only the respiratory water loss component.

During a typical run, we varied O<sub>2</sub> concentration from 21 to 6% in five discrete steps (21, 15, 12, 10, 8 and 6±0.2% O<sub>2</sub>). At least one, and usually 3–5, DGCs were recorded at each O<sub>2</sub> concentration at which the ant cycled, after a 1–2 DGC equilibration period, depending on DGC frequency at the concentration used. This protocol was chosen because it minimized acclimation periods to hypoxic conditions (see Discussion). A typical recording lasted about 6 h and consisted of simultaneous recordings of rate of CO<sub>2</sub> production ( $\dot{V}_{\text{CO}_2}$ ), rate of H<sub>2</sub>O loss ( $\dot{V}_{\text{H}_2\text{O}}$ ) and ambient O<sub>2</sub> concentration data. All experiments were carried out at room temperature (25±1 °C) in an air-conditioned laboratory.

### Statistics

DATA CAN V software was used for all data acquisition and analysis of the resulting recordings. Summary statistics were analyzed with software written by J.R.B.L. and validated

against SYSTAT version IV (Wilkinson, 1988). Means are accompanied by standard deviations (S.D.) and sample sizes (*N*) and are compared using Student's *t*-test. Regressions are calculated by least mean squares, compared using analysis of covariance (ANCOVA) and tested for significance using analysis of variance (ANOVA).

## Results

### Metabolic parameters

Using the techniques described above, our decapitated ant preparations cycled reliably for 12 h or more (Fig. 1) with a slight reduction in  $\dot{V}_{\text{CO}_2}$  and DGC frequency as the run progressed, even in normoxic conditions. This 'winding-down' effect was, however, minimal compared with the effects of hypoxia (Fig. 2). We succeeded in producing eight headless preparations (mean original body mass 107.4±7.1 mg, mean head mass 10.6±0.36 mg) that cycled normally within 30 min of decapitation and remained in good condition for the duration of the recording. Typical data from a complete recording are shown in Fig. 2. At an ambient O<sub>2</sub> concentration of 21%, mean  $\dot{V}_{\text{CO}_2}$  was 0.178±0.031 ml g<sup>-1</sup> h<sup>-1</sup> at 25 °C (*N*=8). This corresponds to a mean standard metabolic rate (SMR, assuming RQ=0.73; Lighton, 1992) of 143.5±32.5 μW.

$\dot{V}_{\text{CO}_2}$  decreased by 2.8±0.6 μl g<sup>-1</sup> h<sup>-1</sup> for every 1% decrease in O<sub>2</sub> tension below 21%. This corresponded to a decrease of approximately 20% in  $\dot{V}_{\text{CO}_2}$  as ambient O<sub>2</sub> concentrations decreased from 21 to 8%. It is premature, however, to regard *C. vicinus* as a metabolic conformer that does not show a critical O<sub>2</sub> concentration (at least in the range 8–15% O<sub>2</sub>) above which  $\dot{V}_{\text{O}_2}$  and, hence,  $\dot{V}_{\text{CO}_2}$  are constant. Estimating the magnitude and significance of such effects was complicated by our experimental design, which concentrated on C and F phase regulation on an individual cycle basis only, thus controlling for any larger-scale changes in  $\dot{V}_{\text{CO}_2}$ . Reducing

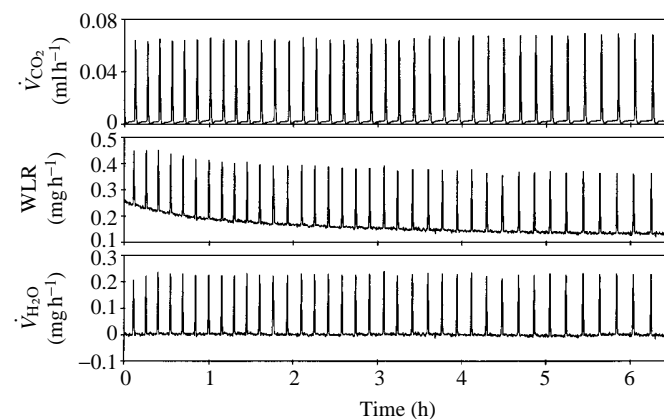

Fig. 1. Typical normoxic recording of  $\dot{V}_{\text{CO}_2}$  (ml h<sup>-1</sup>), total water loss rate (WLR; mg h<sup>-1</sup>) and respiratory water loss rate ( $\dot{V}_{\text{H}_2\text{O}}$ , mg h<sup>-1</sup>).  $\dot{V}_{\text{H}_2\text{O}}$  is derived from the WLR trace by subtraction of the cuticular (interburst) WLR component, using a polynomial baseline correction algorithm. This recording is from a worker ant, mass 30 mg; mean DGC frequency 1.59 mHz, mean  $\dot{V}_{\text{CO}_2}$  6.64 μl h<sup>-1</sup>.

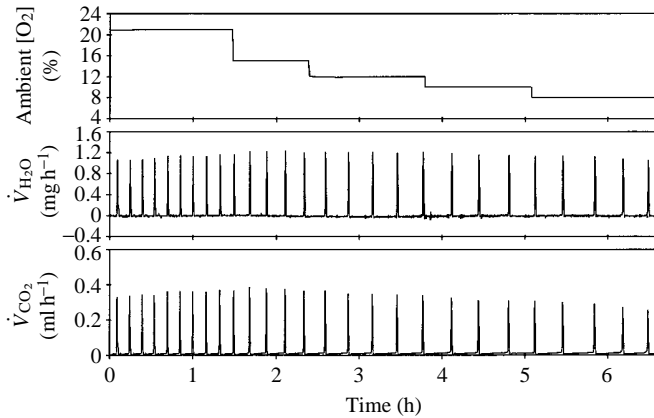

Fig. 2. Typical recording of ambient O<sub>2</sub> concentration (upper trace; percentage), rate of respiratory H<sub>2</sub>O loss ( $\dot{V}_{H_2O}$ ; mg h<sup>-1</sup>) and  $\dot{V}_{CO_2}$  (ml h<sup>-1</sup>) during hypoxic respirometry. Cycling ceased at 6% O<sub>2</sub> (not shown). Ant mass was 110.4 mg, head mass 9.8 mg, ambient temperature 25.0 °C.

ambient O<sub>2</sub> concentrations from 21 to 6% in small steps was essential to allow the preparations to equilibrate incrementally from normoxic to hypoxic conditions, but unavoidably introduced a systematic time component that may also have affected SMR. This may account for a significant proportion of the observed decrease in  $\dot{V}_{CO_2}$  over each experimental period. We were concerned in this study only with actual  $\dot{V}_{CO_2}$  at each ambient O<sub>2</sub> concentration; further data on metabolic regulation *per se* require a randomized design to remove ageing effects.

#### Discontinuous external gas exchange

As O<sub>2</sub> concentrations decreased, DGC frequency decreased markedly (Fig. 3), falling from 1.7 mHz (DGC duration of 10 min) to 0.8 mHz (DGC duration of 20 min) at O<sub>2</sub>

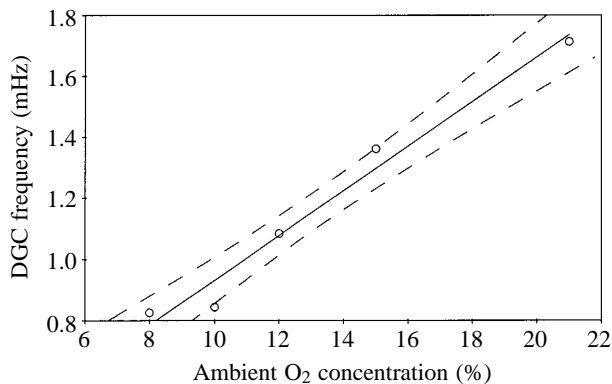

Fig. 3. The effect of ambient O<sub>2</sub> concentration on DGC frequency. Each point is the mean value for eight ants, with 1–5 DGCs per ant at each ambient O<sub>2</sub> concentration.  $DGCF=0.200+0.0731[O_2]$ , where DGCF is DGC frequency in mHz and [O<sub>2</sub>] is ambient O<sub>2</sub> concentration as a percentage. The dashed curves denote the 95% confidence intervals of the regression. The standard error of the slope is 0.0007. The equation explains 98% of the variance in DGC frequency ( $F[1,3]=117.4$ ,  $P=0.001$ ).

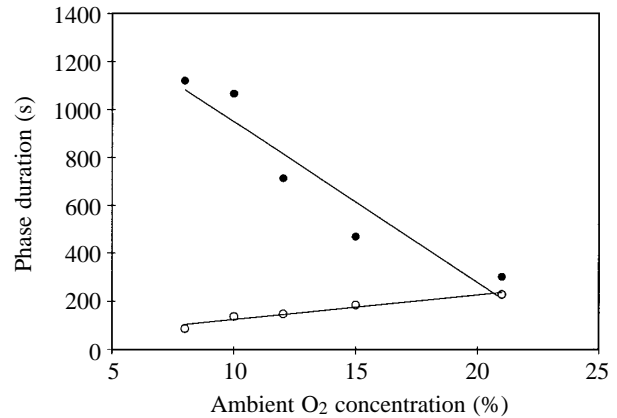

Fig. 4. The effect of ambient O<sub>2</sub> concentration on C and F phase duration (filled and open circles, respectively). Each point is the mean value for eight ants, with 1–5 DGCs per ant at each ambient O<sub>2</sub> concentration.  $CPD=23.15+10.10[O_2]$ , where CPD is C phase duration in seconds and [O<sub>2</sub>] is ambient O<sub>2</sub> concentration as a percentage ( $r^2=0.95$ ,  $F[1,3]=52.1$ ,  $P=0.005$ ).  $FPD=1621.4+67.23[O_2]$ , where FPD is F phase duration in seconds ( $r^2=0.89$ ,  $F[1,3]=25.5$ ,  $P=0.01$ ).

concentrations of 21 and 8%, respectively. At 6% O<sub>2</sub>, external gas exchange ceased in all but one of our preparations, and the single exception cycled once only. Because at least two cycles are required to yield all of the DGC parameters we analyzed, data from 6% O<sub>2</sub> were not analyzed further.

Although DGC duration as a whole increased with decreasing O<sub>2</sub> tension, the three phases of the DGC differed significantly in their responses to hypoxia. O phase duration remained constant at  $99.7\pm 4.8$  s ( $P>0.2$ ). The duration of the C phase declined, while increasing F phase duration was entirely responsible for the overall increase in DGC duration with increasing hypoxia (Fig. 4).

Under normoxic conditions, O phase CO<sub>2</sub> emission volumes were  $24.4\pm 5.5$   $\mu\text{l g}^{-1}$  and H<sub>2</sub>O loss was  $75.6\pm 20.6$   $\mu\text{g g}^{-1}$  ( $N=112$  measurements on eight ants). These are statistically equivalent to previous measurements made on workers of this species (Lighton, 1992;  $P\geq 0.1$ ), but the somewhat higher H<sub>2</sub>O losses and lower CO<sub>2</sub> emissions resulted in a higher ratio of H<sub>2</sub>O lost:CO<sub>2</sub> emitted during the O phase ( $3.07\pm 0.27$ ) than that of worker ants ( $P=0.05$ ). Hypoxia increased O phase H<sub>2</sub>O loss volumes (Fig. 5), but did not affect O phase CO<sub>2</sub> emission volumes or rates, which remained constant at  $25.8\pm 10.4$   $\mu\text{l g}^{-1}$  and  $0.939\pm 0.031$  ml g<sup>-1</sup> h<sup>-1</sup>, respectively ( $P>0.3$ ).

Reflecting the decline in overall  $\dot{V}_{CO_2}$ , C phase  $\dot{V}_{CO_2}$  (probably trans-cuticular in origin; see Lighton and Wehner, 1993) decreased slightly but significantly as ambient O<sub>2</sub> concentration declined (Fig. 6). In contrast, F phase  $\dot{V}_{CO_2}$  increased markedly as ambient O<sub>2</sub> concentration declined (Fig. 6), in spite of the decrease in overall  $\dot{V}_{CO_2}$ . As ambient O<sub>2</sub> concentration decreased from 21 to 8%, rising F phase  $\dot{V}_{CO_2}$  and declining overall  $\dot{V}_{CO_2}$  combined to elevate F phase  $\dot{V}_{CO_2}$  from 31 to 56% of overall  $\dot{V}_{CO_2}$  (Fig. 7).

C phase  $\dot{V}_{H_2O}$  was the operational baseline of the H<sub>2</sub>O loss

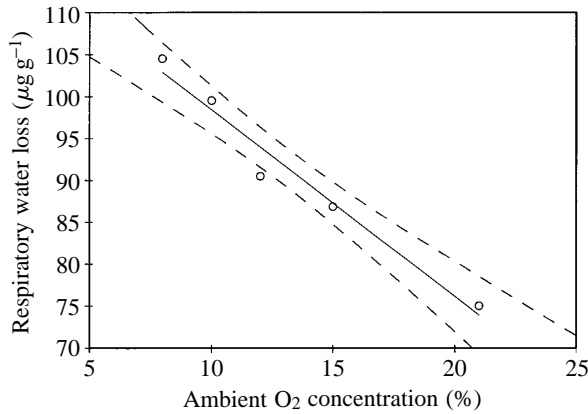

Fig. 5. The effect of ambient  $O_2$  concentration on respiratory  $H_2O$  loss during the O phase. Each point is the mean value for eight ants, with 1–5 DGCs per ant at each ambient  $O_2$  concentration.  $OWL=120.7-2.229[O_2]$ , where OWL is respiratory  $H_2O$  loss in  $\mu g g^{-1}$  and  $[O_2]$  is ambient  $O_2$  concentration as a percentage. The dashed curves denote the 95 % confidence intervals of the regression. The standard error of the slope is 0.237. The equation explains 97 % of the variance in respiratory water loss during the O phase ( $F[1,3]=88.2, P=0.002$ ).

trace and so was not correlated with ambient  $O_2$  concentration. Perhaps because of the greater noise in the  $\dot{V}_{H_2O}$  measurements, ambient  $O_2$  concentration exerted no obvious effect on F phase  $\dot{V}_{H_2O}$  ( $P>0.2$ ). However, by subtracting molar C phase  $\dot{V}_{H_2O}$  from molar F phase  $\dot{V}_{H_2O}$  for each DGC, the noise in the system could be controlled to a greater extent. Under these circumstances, the increase in molar water loss rate during the F phase with increasing hypoxia was significant, in spite of the considerable noise in the signal (Fig. 8). Not surprisingly, in view of the lower noise of the  $CO_2$  measurement system, the

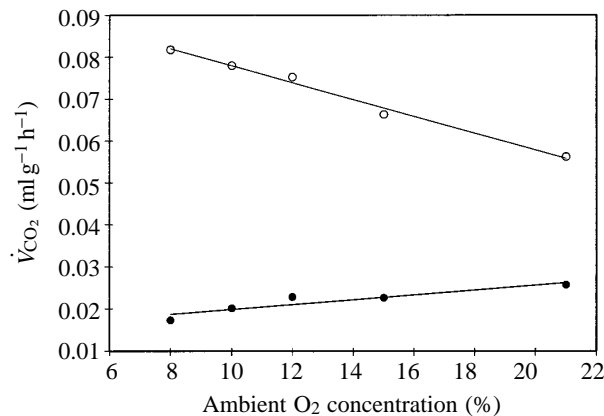

Fig. 6. C phase and F phase  $\dot{V}_{CO_2}$  ( $CV_{CO_2}$ , filled circles;  $FV_{CO_2}$ , open circles,  $ml g^{-1} h^{-1}$ ) as a function of ambient  $O_2$  concentration. Each point is the mean value for eight ants, with 1–5 DGCs per ant at each ambient  $O_2$  concentration.  $CV_{CO_2}=0.0141+0.00058[O_2]$ , where  $[O_2]$  is ambient  $O_2$  concentration as a percentage ( $r^2=0.86, F[1,3]=18.5, P=0.02$ ).  $FV_{CO_2}=0.0981-0.0020[O_2]$  ( $r^2=0.99, F[1,3]=289, P<0.001$ ).

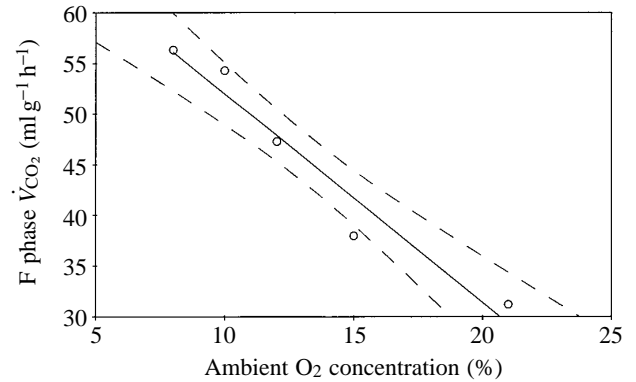

Fig. 7. The effect of ambient  $O_2$  concentration on the percentage of overall  $CO_2$  attained by F phase  $\dot{V}_{CO_2}$  (FPC). Each point is the mean value for eight ants, with 1–5 DGCs per ant at each ambient  $O_2$  concentration.  $FPC=72.6-2.058[O_2]$ , where  $[O_2]$  is ambient  $O_2$  concentration as a percentage. The dashed curves denote the 95 % confidence intervals of the regression. The standard error of the slope is 0.275. The equation explains 95 % of the variance in DGC frequency ( $F[1,3]=56.2, P=0.005$ ).

increase in molar  $\dot{V}_{CO_2}$  from the C to the F phase was highly significant (Fig. 8). Expressing rates in molar terms allows direct comparison between  $H_2O$  and  $CO_2$  emission rates. As ambient  $O_2$  concentrations decreased, the increase of molar F phase  $\dot{V}_{CO_2}$  and  $\dot{V}_{H_2O}$  relative to C phase levels shared a common slope and intercept (Fig. 8). During the F phase, therefore, molar rates of respiratory  $CO_2$  and  $H_2O$  loss were

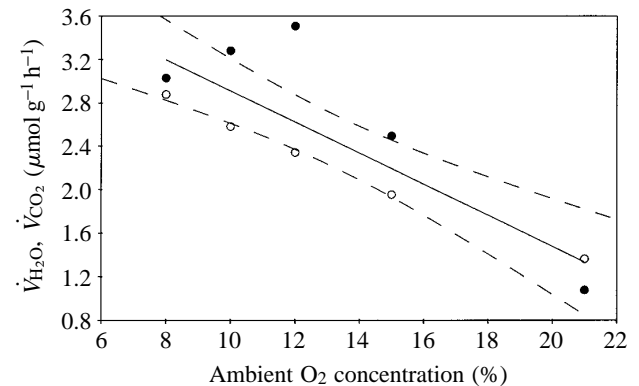

Fig. 8. The effect of ambient  $O_2$  concentration on the increase in  $\dot{V}_{H_2O}$  (filled circles) and  $\dot{V}_{CO_2}$  (open circles) from the C to the F phase. Each point is the mean value for eight ants, with 1–5 DGCs per ant at each ambient  $O_2$  concentration.  $\dot{V}_{H_2O}=4.93-0.171[O_2]$ , where  $\dot{V}_{H_2O}$  is the increase from C phase  $\dot{V}_{H_2O}$  to F phase  $\dot{V}_{H_2O}$  in  $\mu mol g^{-1} h^{-1}$  and  $[O_2]$  is ambient  $O_2$  concentration as a percentage ( $r^2=0.80, F[1,3]=11.7, P=0.04$ ).  $\dot{V}_{CO_2}=3.75-0.116[O_2]$ , where  $\dot{V}_{CO_2}$  is the increase from C phase  $\dot{V}_{CO_2}$  to F phase  $\dot{V}_{CO_2}$  in  $\mu mol g^{-1} h^{-1}$  ( $r^2=0.99, F[1,3]=463, P<0.001$ ). By ANCOVA, the two lines share a common slope [ $F[1,6]=1.20, P(\text{different slopes})=0.3$ ] and a common intercept [ $F[1,7]=3.87; P(\text{different intercepts})=0.09$ ]. The common slope is  $-0.143$ ; the common intercept is 4.342. The common regression line is shown. The dashed curves denote the 95 % confidence intervals of the common regression.

equivalent. This is in contrast to the O phase, where the molar ratio of H<sub>2</sub>O:CO<sub>2</sub> lost (at normoxia) is  $3.81 \pm 0.33$ , which differs significantly from 1.0 ( $P < 0.001$ ; see also Discussion).

## Discussion

### *Standard metabolic rate*

Ant SMRs are usually measured when the ant is in an intermittently active state. This results in a systematic over-estimation of nearly twofold compared with inactive ants (Lighton and Wehner, 1993). Decapitated ants provide an excellent means of controlling for activity by virtue of their profoundly passive disposition. In a previous investigation, it was found that the DGCs and SMRs of completely inactive intact and decapitated *Cataglyphis bicolor* of the same body mass were almost exactly equivalent (Lighton *et al.* 1993a). This is not surprising in view of the decentralized nature of spiracular control in insects (Miller, 1964, 1981; Kaars, 1981). In the present investigation, the equation of Lighton and Wehner (1993;  $SMR = 1143M^{0.933}$ , where SMR is in  $\mu W$  and body mass  $M$  is in g) predicts an SMR of  $142.1 \mu W$  at 25 °C for an ant of 107 mg live body mass. Our measured SMR of  $143.5 \pm 32.5 \mu W$  at 21 % O<sub>2</sub> and 25 °C is statistically equivalent to this estimate and suggests that the head's contribution to overall metabolic flux is small, at least during inactivity. During intense mandibular activity, overall gas-exchange rates can increase by as much as 31-fold (Roces and Lighton, 1995) and it may be for this reason that CO<sub>2</sub> sensors exist in the heads of some insects (see Miller, 1964). However, the relevance of such sensors to insects at rest is doubtful.

### *Discontinuous external gas exchange*

#### *The O phase*

At normoxic levels, our external gas-exchange data are essentially equivalent to those reported previously for decapitated workers of *C. vicinus* (Lighton, 1992), although the DGC frequency and  $\dot{V}_{CO_2}$  of our sample of alates was significantly lower, reflecting their larger masses ( $P < 0.05$ ). As noted in previous investigations, far more H<sub>2</sub>O than CO<sub>2</sub> is lost during the O phase. Presumably this reflects the fact that most of the CO<sub>2</sub> emitted during each O phase must diffuse from the hemolymph prior to entering the tracheal system and leaving *via* the spiracles, whereas H<sub>2</sub>O can evaporate directly and rapidly from the tracheolar respiratory surfaces. In the F phase, however, endotracheal CO<sub>2</sub> concentrations may be high enough to eliminate or reduce this effect (see below).

The significant increase in O phase respiratory water loss with hypoxia is rather interesting (Fig. 5). Reduction of ambient O<sub>2</sub> concentration cannot explain this effect directly. Presumably, the increase in O phase H<sub>2</sub>O loss stems both from increased spiracular conductance and from an increase of moist tracheolar surface area as ambient O<sub>2</sub> concentration decreases (see Wigglesworth, 1972). Any effect of hypoxia on the tracheoles must be confined to the O and early C phase because the longest phase of the DGC (F) is characterized by constant endotracheal O<sub>2</sub> concentrations of approximately 3% (see

Levy and Schneiderman, 1966). Conceivably, the increase in O phase water loss rate could also result from more intense ventilatory activity, such as hemolymph pressure pulsations (Slama, 1994), although the existence of such phenomena in ants is questionable (Lighton, 1994).

#### *The C phase mechanism*

The hypothesis that the C phase ends, and the F phase is initiated, when endotracheal O<sub>2</sub> tensions fall to a critical point can readily be tested. Assuming that endotracheal volumes and the critical O<sub>2</sub> tension remain constant with decreasing ambient O<sub>2</sub> concentrations, C phase duration should be directly and linearly related to ambient O<sub>2</sub> concentration. The null hypothesis – that ambient O<sub>2</sub> concentration has no effect on C phase duration – is plainly false (Fig. 4).

#### *The F phase mechanism*

During the F phase, O<sub>2</sub> enters the insect at a rate equivalent to tissue-level  $\dot{V}_{O_2}$  (Levy and Schneiderman, 1966). The exact mechanism of O<sub>2</sub> ingress is, of course, controversial. Three quite distinct possibilities are likely: that the F phase is mediated by convection alone (Snyder *et al.* 1995), by diffusion alone (Kanwisher, 1966) or by a combination of the two (see Kestler, 1985). Which of these three hypotheses is least contradicted by our experimental evidence?

If the F phase is mediated by convection alone, then as ambient O<sub>2</sub> concentration decreases and less O<sub>2</sub> is obtained *via* convection, the F phase should terminate prematurely because of excessive nitrogen accumulation (Snyder *et al.* 1995). On the contrary, F phase duration *increases* markedly with decreasing ambient O<sub>2</sub> concentration (Fig. 4), so our data conclusively disprove this hypothesis. A *completely* convective F phase would, by definition, also lack a measurable diffusive component and, therefore, would not be detectable by flow-through respirometry in the first place (Lighton, 1994). The F phase is, however, easily detected by this technique (Figs 1, 2; see also Lighton *et al.* 1993a for validation by direct spiracular observation).

If, however, the F phase has a significant diffusive component, it should be detectable by flow-through respirometry, which is clearly the case (Figs 1, 2). Furthermore, in a diffusive F phase, a decrease in ambient O<sub>2</sub> concentration requires either an increase in the effective diameter of the fluttering spiracles or (more likely) a change in the duty cycle of the fluttering to favor the open rather than the closed position. In any event, this increase in effective spiracular conductance allows sufficient O<sub>2</sub> to enter the tracheal system *via* the shallower concentration gradient to satisfy mitochondrial demands. Simultaneously, it must necessarily permit proportionately more CO<sub>2</sub> (and N<sub>2</sub> and H<sub>2</sub>O) to escape from the tracheal system. The release of significant volumes of CO<sub>2</sub> will delay the hypercapnic trigger that initiates the O phase, thus lengthening the F phase. This is precisely what we observed (Figs 4, 5).

The increase in absolute diffusion rates through the spiracles as ambient O<sub>2</sub> concentration decreases can be demonstrated in

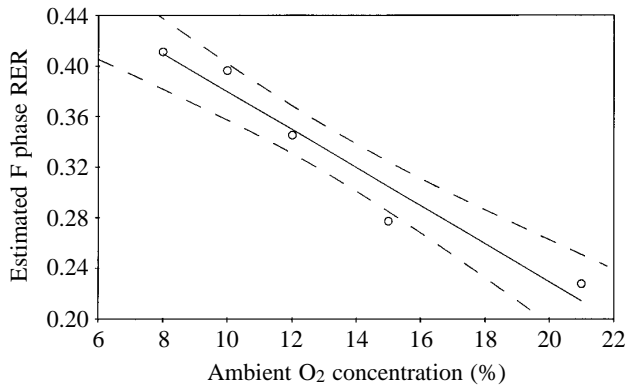

Fig. 9. The effect of ambient O<sub>2</sub> concentration on the estimated respiratory exchange ratio (RER, or short-term  $\dot{V}_{\text{CO}_2}/\dot{V}_{\text{O}_2}$ ) during the F phase. This RER reflects diffusive O<sub>2</sub> uptake only. Each point is the mean value for eight ants, with 1–5 DGCs per ant at each ambient O<sub>2</sub> concentration.  $\text{RER} = 0.530 - 0.0150[\text{O}_2]$ , where  $[\text{O}_2]$  is ambient O<sub>2</sub> concentration as a percentage. The dashed curves denote the 95% confidence intervals of the regression. The standard error of the slope is 0.0020. The equation explains 95% of the variance in DGC frequency ( $F[1,3]=56.2$ ,  $P=0.005$ ).

other ways. For example, direct calculation of the respiratory exchange ratio or RER (short-term  $\dot{V}_{\text{CO}_2}/\dot{V}_{\text{O}_2}$ ) from typical tracheal *versus* external gas concentrations during the F phase under normoxic conditions, assuming simple diffusion, predicts an RER of approximately 0.2–0.3 (see Lighton, 1988a). The estimated RER of our normoxic ants was  $0.23 \pm 0.05$  ( $N=8$ ; calculated from F phase  $\dot{V}_{\text{CO}_2}$  and whole-DGC  $\dot{V}_{\text{O}_2}$  which, in turn, was estimated from whole-DGC  $\dot{V}_{\text{CO}_2}$  and respiratory quotient, RQ, assumed to be 0.73; Lighton, 1992). As expected in a diffusion-based system, this figure increases as ambient O<sub>2</sub> concentrations drop and the trans-spiracular O<sub>2</sub> concentration gradient becomes shallower, necessitating an increase in spiracular conductance (Fig. 9). Note that our experimentally determined normoxic RER accurately matches the RER estimated for a purely diffusive F phase. Clearly, it is not parsimonious to propose that processes other than diffusion are essential components of the F phase, in the case of *C. vicinus* at least.

To a good approximation, the rates of diffusion of CO<sub>2</sub> and H<sub>2</sub>O differ according to the inverse square of their molecular masses (Graham's Law). The ratio of  $\dot{V}_{\text{CO}_2}/\dot{V}_{\text{H}_2\text{O}}$  during the F phase should be  $(1/\sqrt{44})/(1/\sqrt{18})$ , or 1.6, if these rates are purely diffusive and the partial pressure gradients are similar (2–6 kPa CO<sub>2</sub>; Levy and Schneiderman, 1966, J. Harrison, personal communication; and 3 kPa H<sub>2</sub>O at 25 °C, assuming endotracheal saturation and desiccating external conditions). As shown in Fig. 8, molar F phase  $\dot{V}_{\text{CO}_2}$  and  $\dot{V}_{\text{H}_2\text{O}}$  were equivalent, i.e. their ratio does not differ significantly from 1.0 and is not itself a function of ambient O<sub>2</sub> concentration. The actual ratio of F phase  $\dot{V}_{\text{CO}_2}/\dot{V}_{\text{H}_2\text{O}}$  is  $0.651 \pm 2.235$  ( $N=112$  DGCs measured in eight ants), which is obviously not significantly different from 1.6 ( $t=0.4$ ;  $P>0.4$ ). There is, nevertheless, a slight tendency for greater emission rates of

H<sub>2</sub>O than CO<sub>2</sub> during the F phase. The somewhat slower diffusion of CO<sub>2</sub> presumably reflects the fact that CO<sub>2</sub> diffuses from the hemolymph into the tracheal system, whereas H<sub>2</sub>O evaporates directly from the respiratory surfaces, before either gas can effuse through the spiracles. However, this effect is not statistically significant. We therefore cannot disprove the hypothesis that diffusion alone adequately explains the observed relative rates of CO<sub>2</sub> and H<sub>2</sub>O release during the F phase.

Our findings may not apply to all systems that exhibit a DGC, in particular diapausing lepidopteran pupae, in which negative endotracheal pressure is definitely generated during the F phase (e.g. Slama, 1988; but see Kanwisher, 1966). Moreover, in such pupae, F phase duration decreases with decreasing ambient oxygen concentration (Schneiderman and Williams, 1955; Levy and Schneiderman, 1966), as predicted for a purely convective F phase (Snyder *et al.* 1995). The role of convection in the F phase of adult insects, in contrast, remains unclear. It is known that at least some insects develop negative endotracheal pressures during the F phase (Kestler, 1985; Lighton *et al.* 1993a), making inward mass flow eminently feasible. However, we currently have no compelling evidence that convection plays a significant role during the F phase in adult insects; it certainly did not appear to do so in our experiments.

Further, we have demonstrated that molar rates of CO<sub>2</sub> and H<sub>2</sub>O loss during the F phase are equivalent within experimental error. The observation that approximately equivalent amounts of H<sub>2</sub>O and CO<sub>2</sub> are lost during the F phase calls into question its role in reducing respiratory H<sub>2</sub>O loss (see also Lighton and Berrigan, 1995). However, during the O phase the rate of H<sub>2</sub>O loss, relative to CO<sub>2</sub> emission, increases approximately fourfold over F phase levels. It follows that the resistance to outward diffusion imposed by spiracular fluttering must diminish the significance of rates of CO<sub>2</sub> diffusion from the hemolymph into the tracheae (slower) *versus* rates of water evaporation from the tracheal and tracheolar surfaces (faster). Consequently, less water is lost than would be the case in the absence of spiracular control, of which the O phase is an extreme example (Lighton *et al.* 1993b).

Our findings are rather disconcerting in view of the widely held belief, centered around the role of inward convective air flow during the F phase, that the DGC evolved as a mechanism for reducing rates of respiratory water loss (Snyder *et al.* 1995; and see reviews by Miller, 1981; Kestler, 1985; Lighton, 1994; Slama, 1994). Of course, our findings do not imply that inward convective mass flow is necessarily insignificant in all insects; it certainly appears to play an important role in some cockroaches (Kestler, 1985) and moth pupae (see Slama, 1988). Our data nevertheless strongly suggest that the adult insect DGC is not necessarily dependent on convection during the flutter phase and that the effects of the DGC on respiratory water loss rates are more subtle than has been generally supposed.

This study is also relevant to the field biology of ants, which generally dwell in underground nests. It is in such nests that

most species of ants spend the vast majority of their time. Although we are not aware of any fully satisfactory measurements of O<sub>2</sub> concentrations within ant nests, it is reasonable to suppose that poor ventilation combined with high population densities and soil microbial activity may conspire to produce naturally hypoxic conditions. The effects that such conditions may exert on the external gas exchange characteristics of the nest's inhabitants have been the subject of some speculation (Lighton and Berrigan, 1995) and constitute a worthwhile subject for further research.

We are most grateful to the US National Science Foundation (grants BSR 9006265 and IBN 9306537 to J.R.B.L.) and to the David and Lucille Packard Foundation (Fellowship to J.R.B.L.) for financial support, and to David Berrigan, Jon Harrison, Paul Kestler and Barbara Joos for helpful discussions.

### References

- BURKETT, B. N. AND SCHNEIDERMAN, H. A. (1974). Roles of oxygen and carbon dioxide in the control of spiracular function in cecropia pupae. *Biol. Bull. mar. biol. Lab., Woods Hole* **147**, 274–293.
- HADLEY, N. F. AND QUINLAN, M. C. (1993). Discontinuous CO<sub>2</sub> release in the eastern lubber grasshopper *Romalea guttata* and its effect on respiratory transpiration. *J. exp. Biol.* **177**, 169–180.
- KAARS, C. (1981). Insects – spiracle control. In *Locomotion and Energetics in Arthropods* (ed. C. F. Herreid II), pp. 367–390. New York: Plenum.
- KANWISHER, J. W. (1966). Tracheal gas dynamics in pupae of the *Cecropia* silkworm. *Biol. Bull. mar. biol. Lab., Woods Hole* **130**, 96–105.
- KESTLER, A. (1978). Atembewegungen und Gasaustausch bei der Ruheatmung adulter terrestrischer Insekten. *Verh. dt. Zool. Ges.* **1978**, 269.
- KESTLER, A. (1980). Saugventilation verhindert bei Insekten die Wasserabgabe aus dem Tracheensystem. *Verh. dt. Zool. Ges.* **1980**, 306.
- KESTLER, A. (1985). Respiration and respiratory water loss. In *Environmental Physiology and Biochemistry of Insects* (ed. K. H. Hoffmann), pp. 137–183. Berlin: Springer Verlag.
- LEVY, R. I. AND SCHNEIDERMAN, H. A. (1966). Discontinuous respiration in insects. II. The direct measurement and significance of changes in tracheal gas composition during the respiratory cycle of silkworm pupae. *J. Insect Physiol.* **12**, 83–104.
- LIGHTON, J. R. B. (1988a). Simultaneous measurement of oxygen uptake and carbon dioxide emission during discontinuous ventilation in the tok-tok beetle, *Psammodes striatus*. *J. Insect Physiol.* **34**, 361–367.
- LIGHTON, J. R. B. (1988b). Discontinuous carbon dioxide emission in a small insect, the formicine ant *Camponotus vicinus*. *J. exp. Biol.* **134**, 363–376.
- LIGHTON, J. R. B. (1990). Slow discontinuous ventilation in the Namib dune-sea ant *Camponotus detritus* (Hymenoptera, Formicidae). *J. exp. Biol.* **151**, 71–82.
- LIGHTON, J. R. B. (1991a). Ventilation in Namib Desert tenebrionid beetles: mass scaling and evidence of a novel quantized flutter phase. *J. exp. Biol.* **159**, 249–268.
- LIGHTON, J. R. B. (1991b). Measurements on insects. In *Concise Encyclopedia of Biological and Biomedical Measurement Systems* (ed. P. A. Payne), pp. 201–208. Oxford: Pergamon Press.
- LIGHTON, J. R. B. (1992). Simultaneous measurement of CO<sub>2</sub> emission and mass loss in two species of ants. *J. exp. Biol.* **173**, 289–293.
- LIGHTON, J. R. B. (1994). Discontinuous ventilation in terrestrial insects. *Physiol. Zool.* **67**, 142–162.
- LIGHTON, J. R. B. AND BERRIGAN, D. (1995). Questioning paradigms: caste-specific ventilation in harvester ants, *Messor pergandei* and *M. julianus* (Hymenoptera: Formicidae). *J. exp. Biol.* **198**, 5231–530.
- LIGHTON, J. R. B., FUKUSHI, T. AND WEHNER, R. (1993a). Ventilation in *Cataglyphis bicolor*: regulation of CO<sub>2</sub> release from the thoracic and abdominal spiracles. *J. Insect Physiol.* **39**, 687–699.
- LIGHTON, J. R. B., GARRIGAN, D., DUNCAN, F. D. AND JOHNSON, R. A. (1993b). Respiratory water loss during discontinuous ventilation in female alates of the harvester ant *Pogonomyrmex rugosus*. *J. exp. Biol.* **179**, 233–244.
- LIGHTON, J. R. B. AND LOVEGROVE, B. G. (1990). A temperature-induced switch from diffusive to convective ventilation in the honeybee. *J. exp. Biol.* **154**, 509–516.
- LIGHTON, J. R. B. AND WEHNER, R. (1993). Ventilation and respiratory metabolism in the thermophilic desert ant, *Cataglyphis bicolor* (Hymenoptera, Formicidae). *J. comp. Physiol.* **163**, 11–17.
- LOUDON, C. (1989). Tracheal hypertrophy in mealworms: design and plasticity in oxygen supply systems. *J. exp. Biol.* **147**, 217–235.
- MILLER, P. L. (1964). Respiration – aerial gas transport. In *The Physiology of Insecta*, vol. III (ed. M. Rockstein), pp. 558–617. New York: Academic Press.
- MILLER, P. L. (1981). Ventilation in active and in inactive insects. In *Locomotion and Energetics in Arthropods* (ed. C. F. Herreid II), pp. 367–390. New York: Plenum.
- ROCES, F. AND LIGHTON, J. R. B. (1995). Larger bites of leaf-cutting ants. *Nature* **373**, 392–393.
- SCHNEIDERMAN, H. A. AND WILLIAMS, C. M. (1955). An experimental analysis of the discontinuous respiration of the *Cecropia* silkworm. *Biol. Bull. mar. biol. Lab., Woods Hole* **109**, 123–143.
- SLAMA, K. (1988). A new look at insect respiration. *Biol. Bull. mar. biol. Lab., Woods Hole* **175**, 289–300.
- SLAMA, K. (1994). Regulation of respiratory acidemia by the autonomic nervous system (coelopulse) in insects and ticks. *Physiol. Zool.* **67**, 163–174.
- SNYDER, G. K., SHEAFOR, B., SCHOLNICK, D. AND FARRELLY, C. (1995). Gas exchange in the insect tracheal system. *J. theor. Biol.* (in press).
- WIGGLESWORTH, V. B. (1972). *The Principles of Insect Physiology*. London: Chapman and Hall.
- WILKERSON, L. (1988). *SYSTAT: The System for Statistics*. Evanston, IL: SYSTAT Inc.
